# Supplementary material for: Exploring Nurses' Experiences and Challenges in Managing Diabetic Amputations: A Qualitative Study
Source: Research Square preprint supplement (doi:10.21203/rs.3.rs-5891005/v1), 2025-03-27
Supplement: Supplementary file 1 [file 259851adc86905d128c44ef4.pdf]

## **Interview Guide**

### **Section 1: Demographics**

- Gender
- Age
- Years practice
- Level of education
- Rank

### **Interview questions**

1. Can you describe how you feel when caring for patients with diabetic amputations? can you share with examples?
2. What kind of support or resources do you think would help you care for diabetic amputated patients? Tell me more.
3. Tell me the challenges you faced in encouraging patients to adhere to their treatment plans?
4. In your opinion, what recommendation can be made to enable you enhance patient care in your facility?
5. Is there anything else you would like to share about your experiences in managing patients with diabetic amputations?

Thank you for your time and valuable insights. Your contributions are greatly appreciated and will help inform future improvements in patient care and nursing support.
